# Supplementary material for: Copper Ion Removal Using a Waste-Plastic-Derived Hydrogel Adsorbent Prepared via Microwave-Assisted PET Aminolysis
Source: MDPI journal article supplement (doi:10.3390/gels9110874), 2023-11-03
Supplement: s1 [file s1]

## Supplementary Material

# Copper Ion Removal Using a Waste-Plastic-Derived Hydrogel Adsorbent Prepared via Microwave-Assisted PET Aminolysis

Kayee Chan,<sup>1,\*</sup> Masami Kawai,<sup>2,†</sup> Mina Yamake,<sup>3,†</sup> Anatoly Zinchenko<sup>1,\*</sup>

<sup>1</sup> Graduate School of Environmental Studies, Nagoya University, Furo-cho, Chikusa-ku, Nagoya 464-8601, Japan

<sup>2</sup> Gifu High School, 3-1, Onawaba, Gifu 500-8889, Japan

<sup>3</sup> Gifu Kita High School, 1841-11, Noritake, Gifu 502-0931, Japan

\* Correspondence: chan.kayee.v2@s.mail.nagoya-u.ac.jp (K.C.); zinchenko@urban.env.nagoya-u.ac.jp (A.Z.);

Tel.: +81-52-789-7045 (K.C.); +81-52-789-4771 (A.Z.)

† These authors contributed equally to this work.

### 1. Experimental conditions of microwave-assisted depolymerization of PET

The aminolysis of PET was performed in the microwave reactor (Monowave 400, Anton Paar) under autogenous pressure. The reaction was carried out at 200 °C for *ca.* 1 minute (**Figure S1**).

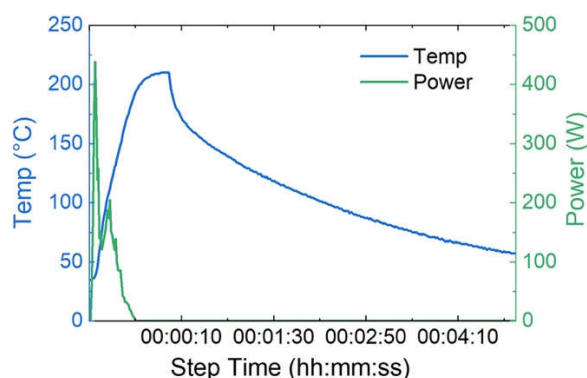

**Figure S1.** Dependences of the microwave power and reaction mixture temperature on the reaction time.
